# Supplementary material for: Intraoperative diagnosis of early lymphatic metastasis using neodymium-based rare-earth NIR-II fluorescence nanoprobe
Source: Royal Society of Chemistry journal article supplement (doi:10.1039/d3na00254c), 2023-01-01
Supplement: d3na00254c1.pdf [file d3na00254c1.pdf]

Supporting Information

**Intraoperative Diagnosis of Early Lymphatic Metastasis Using  
Neodymium-Based Rare-earth NIR-II Fluorescence Nanoprobe**

Guangxin Duan<sup>c#</sup>, Jingyu Zhang<sup>c#</sup>, Zhuxin Wei<sup>a,d#</sup>, Ximing Wang<sup>b</sup>, Jianfeng Zeng<sup>c,e</sup>,  
Shuwang Wu<sup>c</sup>, Chunhong Hu<sup>b\*</sup>, Ling Wen<sup>a,b\*</sup>

<sup>a</sup> Department of Radiology, Suzhou Dushu Lake Hospital, Dushu Lake Hospital  
Affiliated to Soochow University, Medical Centre of Soochow University, Suzhou,  
215001, Jiangsu, China

<sup>b</sup> Department of Radiology, the First Affiliated Hospital of Soochow University,  
Suzhou 215000, China

<sup>c</sup> Center for Molecular Imaging and Nuclear Medicine, State Key Laboratory of  
Radiation Medicine and Protection, School for Radiological and Interdisciplinary  
Sciences (RAD-X), Soochow University, Collaborative Innovation Center of  
Radiological Medicine of Jiangsu Higher Education Institutions, Suzhou 215123,  
China

<sup>d</sup> Department of MRI, Fuwai Hospital, National Center for Cardiovascular Diseases,  
Chinese Academy of Medical Sciences and Peking Union Medical College, Beijing  
100037, China.

<sup>e</sup> Suzhou Xinying Biomedical Technology Co. Ltd., Suzhou 215123, China

#These authors contributed equally;

\*Corresponding authors: hch5305@163.com (C. Hu); wenling@suda.edu.cn (L. Wen)

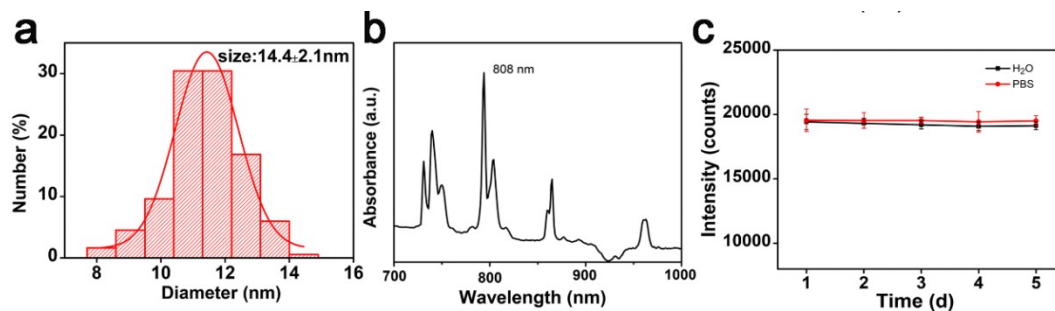

**Fig. S1. Characterizations of NaGdF<sub>4</sub>:5%Nd@NaLuF<sub>4</sub> NPs.** a) Diameter distribution of Gd:Nd-RENPs. b) UV-vis-NIR absorption spectrum of core/shell Gd:Nd-RENPs. c) Photostability of Gd:Nd-RENPs in H<sub>2</sub>O and PBS.

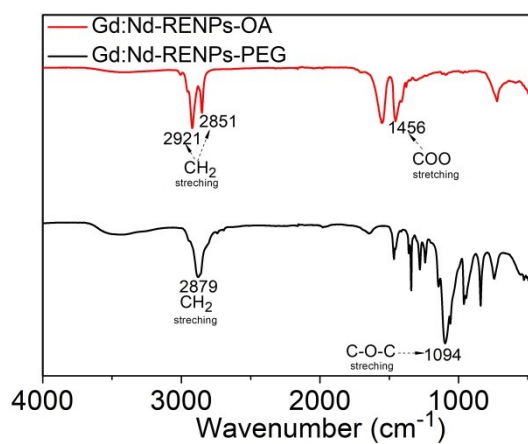

**Figure S2** Fourier transform infrared spectra of OA and PEG modified Gd:Nd-RENPs nanoparticles

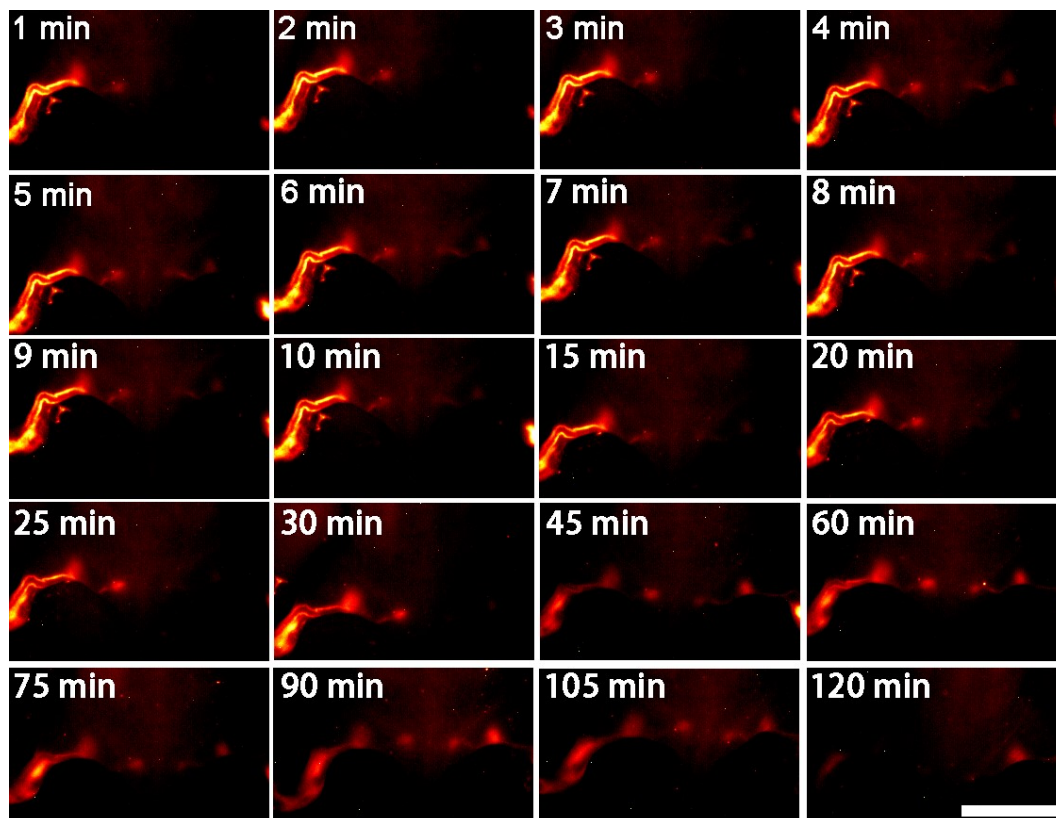

**Fig. S3.** NIR-II fluorescence images of early metastatic SLNs (left side) and normal LNs (right side) at different time points after injection of Gd:Nd-RENPs.

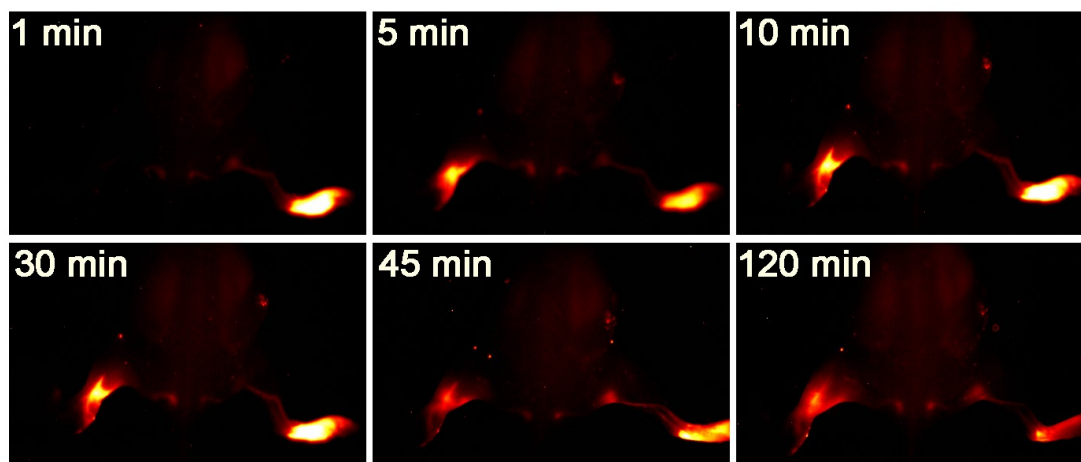

**Fig. S4.** NIR-II fluorescence images of advanced metastatic SLNs (left side) and normal LNs (right side).

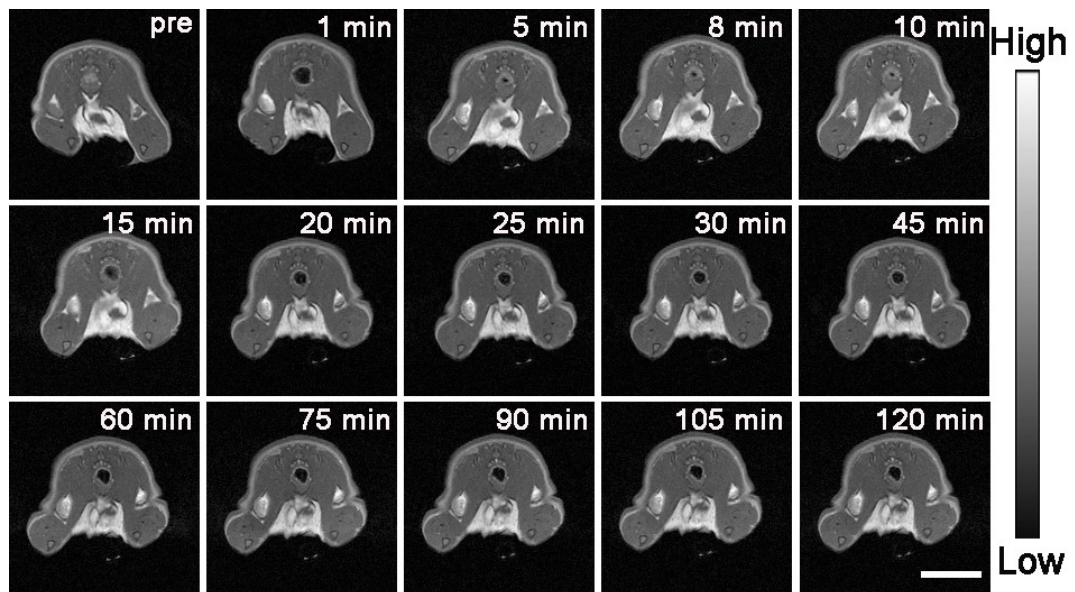

**Fig. S5.** MR images of popliteal and sciatic LNs at different time points after injection of Gd:Nd-RENPs.
